# Supplementary material for: Galaxy: a comprehensive approach for supporting accessible, reproducible, and transparent computational research in the life sciences
Source: Springer Nature journal article supplement (doi:10.1186/gb-2010-11-8-r86), 2010-08-25
Supplement: 13059_2010_2379_MOESM2_ESM.pdf [file 13059_2010_2379_MOESM2_ESM.pdf]

Galaxy

Analyze Data **Workflow** Data Libraries Lab Admin Help User

Tools

- Get Data
- Send Data
- ENCODE Tools
- Lift-Over
- Text Manipulation
- Convert Formats
- FASTA manipulation
- Filter and Sort
- Join, Subtract and Group
- Extract Features
- Fetch Sequences
- Fetch Alignments
- Get Genomic Scores
- Operate on Genomic Intervals
- Statistics
- Graph/Display Data
- Regional Variation
- Multiple regression
- Evolution
- Metagenomic analyses
- EMBOSS
- NGS Toolbox Beta
- NGS: QC and manipulation
- NGS: Mapping
- NGS: SAM Tools
- NGS: Peak Calling
- Workflow control
- Inputs

Workflow Canvas | Clone of 'metagenomic analysis' shared by 'anton@bx.psu.edu'

```

graph LR
    I1[Input dataset] --> S[Select high quality segments]
    I2[Input dataset] --> S
    S --> F1[FASTA-to-Tabular]
    F1 --> A[Add column]
    A --> T[Tabular-to-FASTA]
    T --> C[Compute sequence length]
    C --> M1[Megablast]
    T --> M2[Megablast]
    M1 --> CQ[Concatenate queries]
    M2 --> CQ
    CQ --> J[Join two Queries]
    J --> F[Filter]
    F --> FT[Fetch taxonomic representation]
    FT --> FLR[Find lowest diagnostic rank]
    FLR --> DP[Draw phylogeny]
    DP --> ST[Summarize taxonomy]
  
```

Options

Details

Tool: Filter

Filter  
Data input 'input' (tabular)

With following condition ▼  
c5/c15 > 0.5

Edit Step Attributes

Annotation / Notes:

Add an annotation or notes to this step; annotations are available when a workflow is viewed.

⚠ Double equal signs, ==, must be used as "equal to" (e.g., c1 == "chr22")

ℹ TIP: Attempting to apply a filtering condition may throw exceptions if the data type (e.g., string, integer) in every line of the columns being filtered is not appropriate for the condition (e.g., attempting certain numerical calculations on strings). If an exception is thrown when applying the condition to a line, that line is skipped as invalid for the filter condition. The number of invalid skipped lines is documented in the resulting history item as a "Condition/data issue".

ℹ TIP: If your data is not TAB delimited, use *Text Manipulation* -> *Convert*

Syntax

The filter tool allows you to restrict the dataset using simple conditional statements.

- Columns are referenced with **c** and a **number**. For example, **c1** refers to the first column of a tab-delimited file.

Display a menu
