# Supplementary material for: Galaxy: a comprehensive approach for supporting accessible, reproducible, and transparent computational research in the life sciences
Source: Springer Nature journal article supplement (doi:10.1186/gb-2010-11-8-r86), 2010-08-25
Supplement: 13059_2010_2379_MOESM3_ESM.pdf [file 13059_2010_2379_MOESM3_ESM.pdf]

(a)

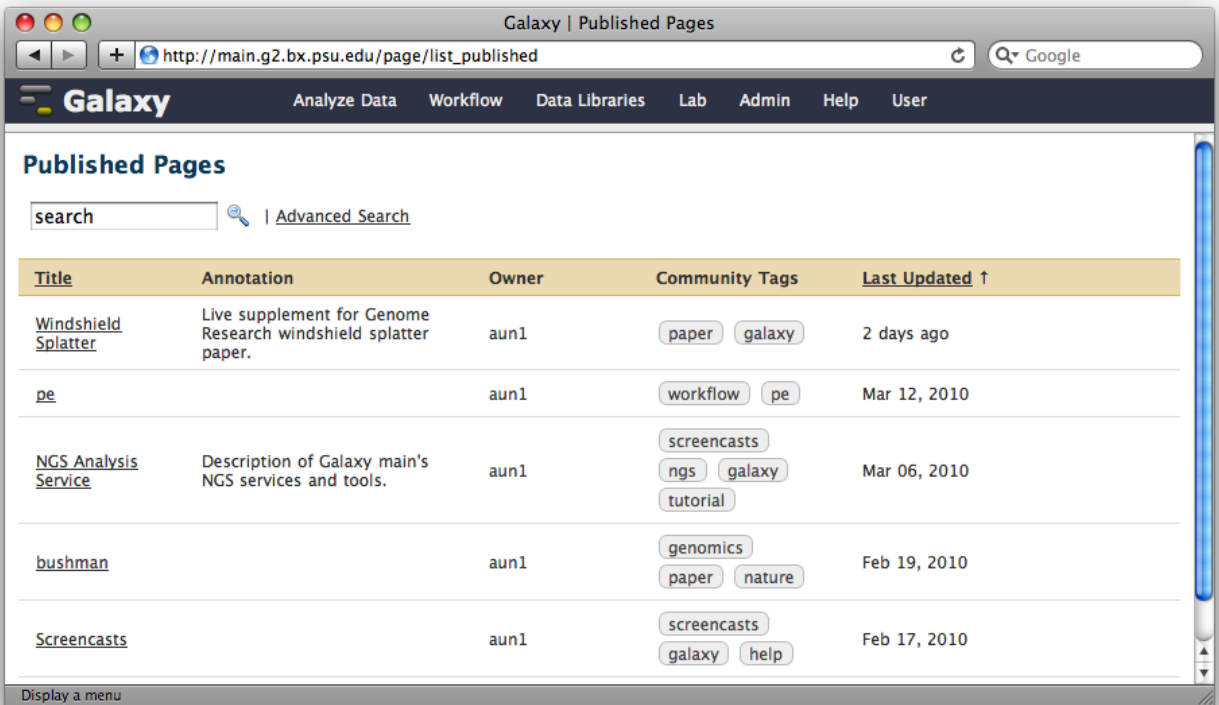

Galaxy | Published Pages

http://main.g2.bx.psu.edu/page/list\_published

Galaxy Analyze Data Workflow Data Libraries Lab Admin Help User

### Published Pages

search  | [Advanced Search](#)

| Title                                | Annotation                                                     | Owner | Community Tags                                                                                        | Last Updated ↑ |
|--------------------------------------|----------------------------------------------------------------|-------|-------------------------------------------------------------------------------------------------------|----------------|
| <a href="#">Windshield Splatter</a>  | Live supplement for Genome Research windshield splatter paper. | aun1  | <a href="#">paper</a> <a href="#">galaxy</a>                                                          | 2 days ago     |
| <a href="#">pe</a>                   |                                                                | aun1  | <a href="#">workflow</a> <a href="#">pe</a>                                                           | Mar 12, 2010   |
| <a href="#">NGS Analysis Service</a> | Description of Galaxy main's NGS services and tools.           | aun1  | <a href="#">screencasts</a><br><a href="#">ngs</a> <a href="#">galaxy</a><br><a href="#">tutorial</a> | Mar 06, 2010   |
| <a href="#">bushman</a>              |                                                                | aun1  | <a href="#">genomics</a><br><a href="#">paper</a> <a href="#">nature</a>                              | Feb 19, 2010   |
| <a href="#">Screencasts</a>          |                                                                | aun1  | <a href="#">screencasts</a><br><a href="#">galaxy</a> <a href="#">help</a>                            | Feb 17, 2010   |

Display a menu

(b)

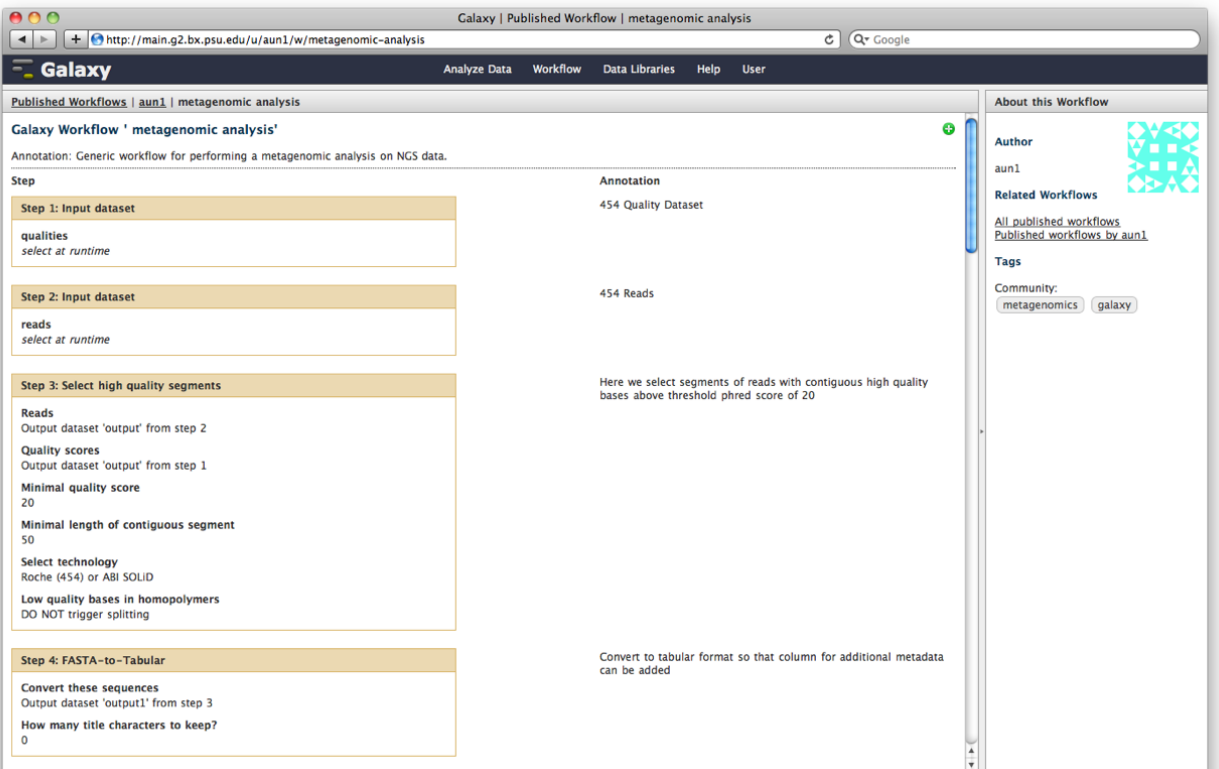

Galaxy | Published Workflow | metagenomic analysis

http://main.g2.bx.psu.edu/u/aun1/w/metagenomic-analysis

Galaxy Analyze Data Workflow Data Libraries Help User

Published Workflows | aun1 | metagenomic analysis

### Galaxy Workflow ' metagenomic analysis'

Annotation: Generic workflow for performing a metagenomic analysis on NGS data.

| Step                                                                                                                                                                                                                                                                                                                                                | Annotation                                                                                            |
|-----------------------------------------------------------------------------------------------------------------------------------------------------------------------------------------------------------------------------------------------------------------------------------------------------------------------------------------------------|-------------------------------------------------------------------------------------------------------|
| <b>Step 1: Input dataset</b><br>qualities<br><i>select at runtime</i>                                                                                                                                                                                                                                                                               | 454 Quality Dataset                                                                                   |
| <b>Step 2: Input dataset</b><br>reads<br><i>select at runtime</i>                                                                                                                                                                                                                                                                                   | 454 Reads                                                                                             |
| <b>Step 3: Select high quality segments</b><br>Reads<br>Output dataset 'output' from step 2<br>Quality scores<br>Output dataset 'output' from step 1<br>Minimal quality score<br>20<br>Minimal length of contiguous segment<br>50<br>Select technology<br>Roche (454) or ABI SOLID<br>Low quality bases in homopolymers<br>DO NOT trigger splitting | Here we select segments of reads with contiguous high quality bases above threshold phred score of 20 |
| <b>Step 4: FASTA-to-Tabular</b><br>Convert these sequences<br>Output dataset 'output1' from step 3<br>How many title characters to keep?<br>0                                                                                                                                                                                                       | Convert to tabular format so that column for additional metadata can be added                         |

About this Workflow

Author  
aun1

Related Workflows  
[All published workflows](#)  
[Published workflows by aun1](#)

Tags

Community:  
[metagenomics](#) [galaxy](#)
